# Supplementary material
Source: PubMed Central journal article supplement (PMC4190605)
Supplement: mmc1.pdf [file mmc1.pdf]

# Supporting Information for “Modest influence of FRET chromophores on the properties of unfolded proteins”

Gül H. Zerze,<sup>†</sup> Robert B. Best,<sup>‡</sup> and Jeetain Mittal<sup>\*,†</sup>

*Department of Chemical Engineering, Lehigh University, Bethlehem, PA 18034, USA, and  
Laboratory of Chemical Physics, NIDDK, National Institutes of Health, Bethesda, MD  
20892, USA*

E-mail: jeetain@lehigh.edu

## Parameterization of chromophores

Our priority in determining parameters was to obtain reasonable non-bonded interactions, as the most critical feature of the model is how the chromophores interact with each other and with the protein. We use standard Amber atom types for all of the atoms in the two chromophores, thus fixing the Lennard-Jones parameters; angle and torsion terms were added by analogy with similar terms in the AMBER force field. Charges were determined using the restrained electrostatic potential (RESP) fitting<sup>1</sup> as implemented in the Antechamber program. For consistency with AMBER charges, electrostatic potentials were determined with unrestricted Hartree-Fock, assuming all carboxylate groups to be deprotonated, i.e. net charge of -2 for each dye; the geometry of each molecule was first optimized with the same

---

\*To whom correspondence should be addressed

<sup>†</sup>Lehigh University

<sup>‡</sup>National Institutes of Health

method. We used the 6-31+G\* basis set in place of the standard 6-31G\*, the diffuse basis functions being included due to the presence of the sulfur atoms in these molecules. We also found that using this basis set gave more reasonable results in the geometry optimizations. Gromacs parameters for the dyes are available upon request from the authors.

Table S1: Sequences of molecules simulated in this study. \*Dyes are attached to cysteine residues given in red.

| Sequences |                                                                                                   |
|-----------|---------------------------------------------------------------------------------------------------|
| CSP       | MRGKVKWFDS KKGYGFITKD EGGDVFVHWS AIEMEGFKTL KEGQVVEFEI QEGKKGPQAA HVKVVE                          |
| CSP Dyes* | MCRGKVKWFD SKKGYGFITK DEGGDVFVHW SAIEMEGFKT LKEGQVVEFE IQEGKKGPQA AHVKVVE <b>C</b>                |
| LR        | GPCLTQEQLD DARRLKAIYE KKKNELGLSQ ESVADKMGMG QSGVGALFNG INALNAYNAA LLAKILKVSV EEFSPSIARE CR        |
| LR Dyes*  | GPCLTQEQLD DARRLKAIYE KKKNELGLSQ ESVADKMGMG QSGVGALFNG INALNAYNAA LLAKILKVSV EEFSPSIARE <b>CR</b> |
| IN        | CFLDGIDKAQ EEHEKYHSNW RAMASDFNLP PVVAKGIVAS CDKCQLKGEA MHGQVDC                                    |
| IN Dyes*  | CFLDGIDKAQ EEHEKYHSNW RAMASDFNLP PVVAKGIVAS CDKCQLKGEA MHGQVDC <b>C</b>                           |

Table S2: Number of non-protein molecules in simulated systems.

|                      | CSP  | CSP Dyes | LR   | LR Dyes | IN   | IN Dyes |
|----------------------|------|----------|------|---------|------|---------|
| <b>Water</b>         | 8339 | 8329     | 8294 | 8234    | 8422 | 8353    |
| <b>Sodium ions</b>   | 10   | 10       | 9    | 11      | 12   | 16      |
| <b>Chloride ions</b> | 10   | 6        | 10   | 8       | 8    | 8       |

## References

- (1) Cieplak, P.; Cornell, W. D.; Bayly, C.; Kollman, P. A. *J. Comput. Chem.* **1995**, *16*, 1357–1377.
- (2) Cross, S.; Kuttel, M. M.; Stone, J. E.; Gain, J. E. *J. Mol. Graph. Model.* **2009**, *28*, 131–139.

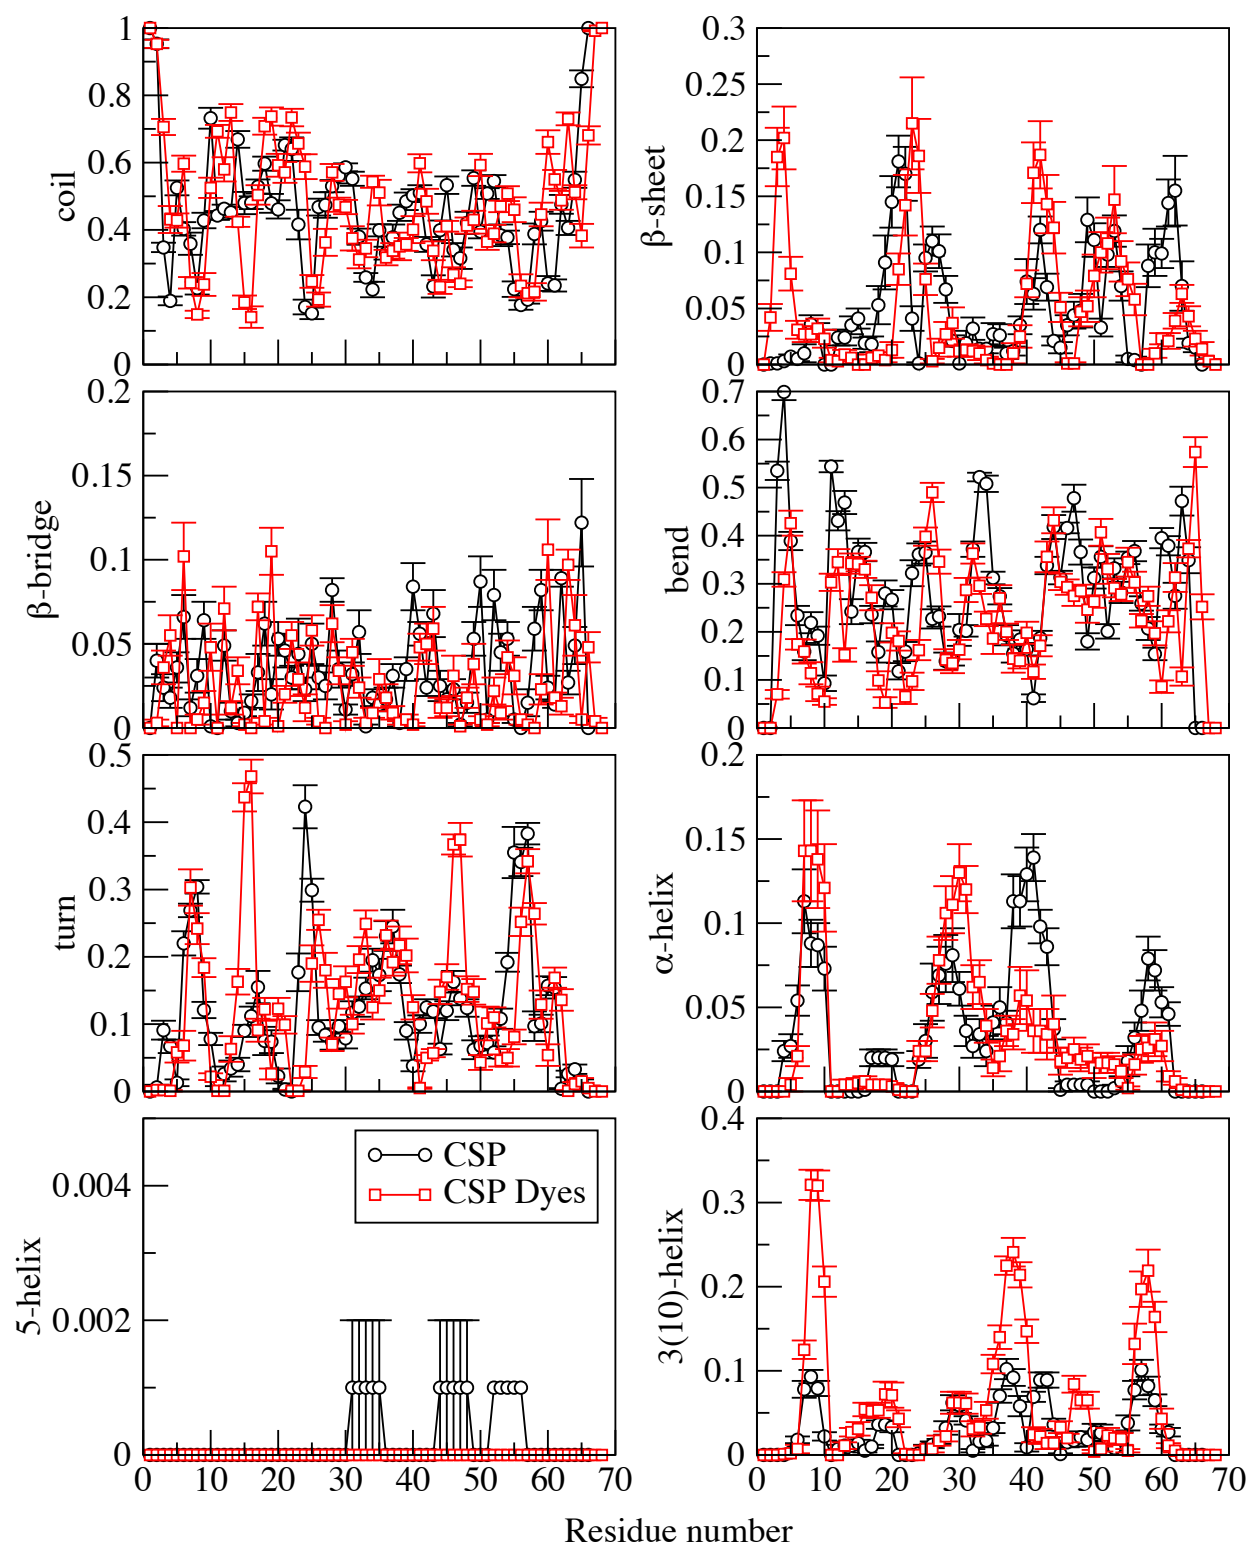

Figure S1: Per-residue secondary structure propensities calculated based on DSSP definition of CSP and CSP Dyes. Standard errors are calculated using block averaging.

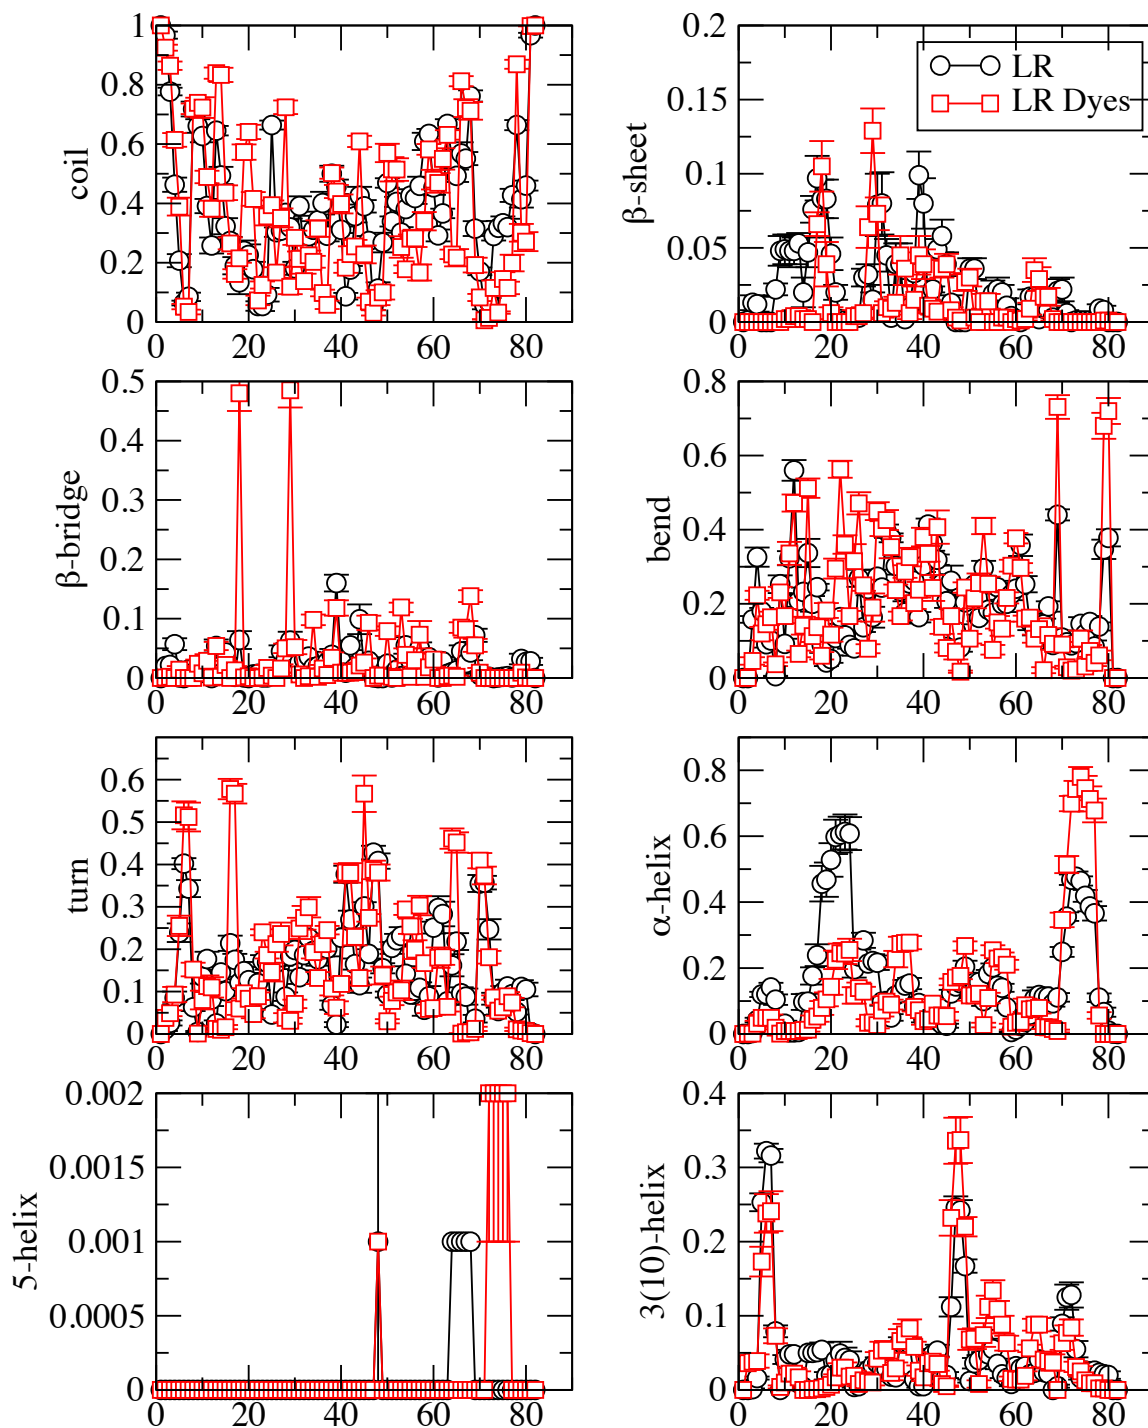

Figure S2: Per-residue secondary structure propensities calculated based on DSSP definition of LR and LR Dyes. Standard errors are calculated using block averaging.

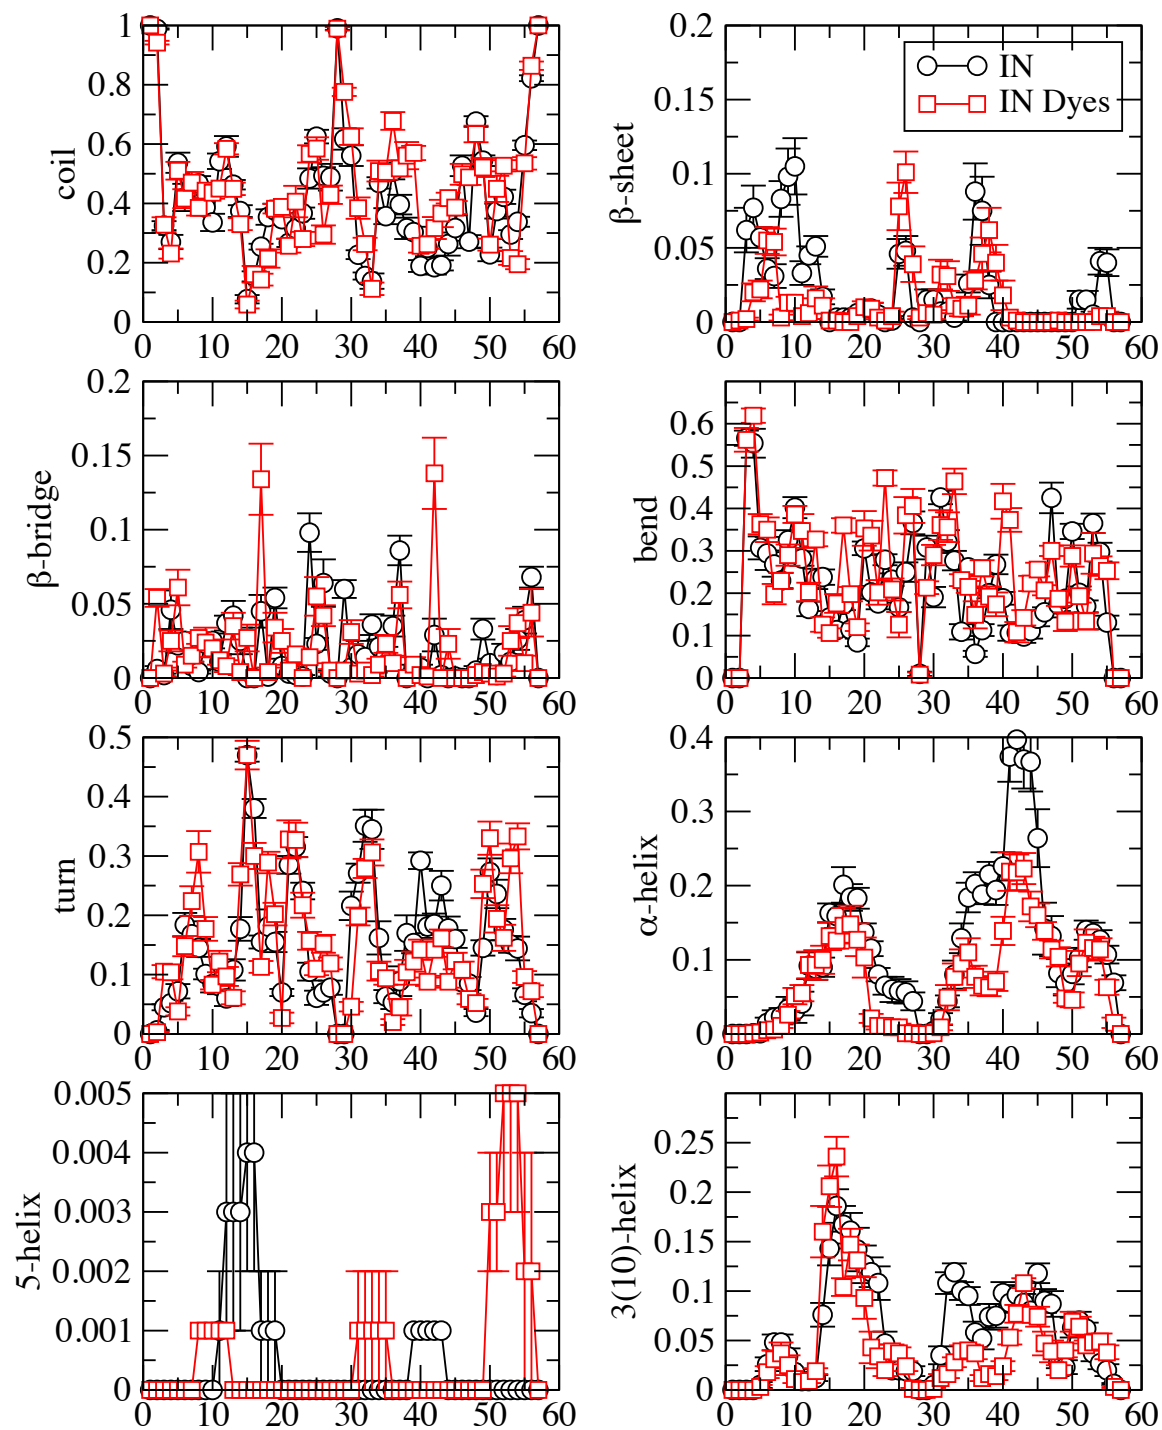

Figure S3: Per-residue secondary structure propensities calculated based on DSSP definition of IN and IN Dyes. Standard errors are calculated using block averaging.

## ALEXA488 (Donor)

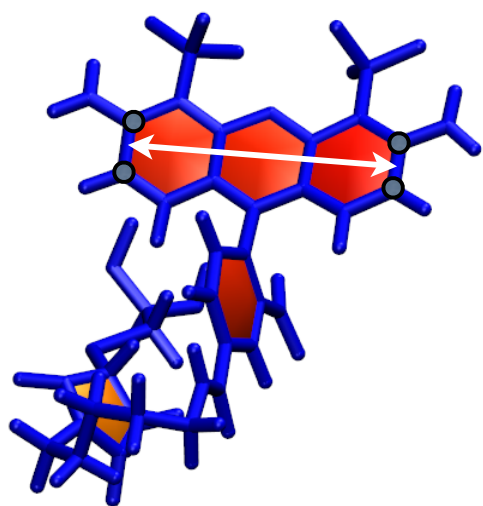

## ALEXA594 (Acceptor)

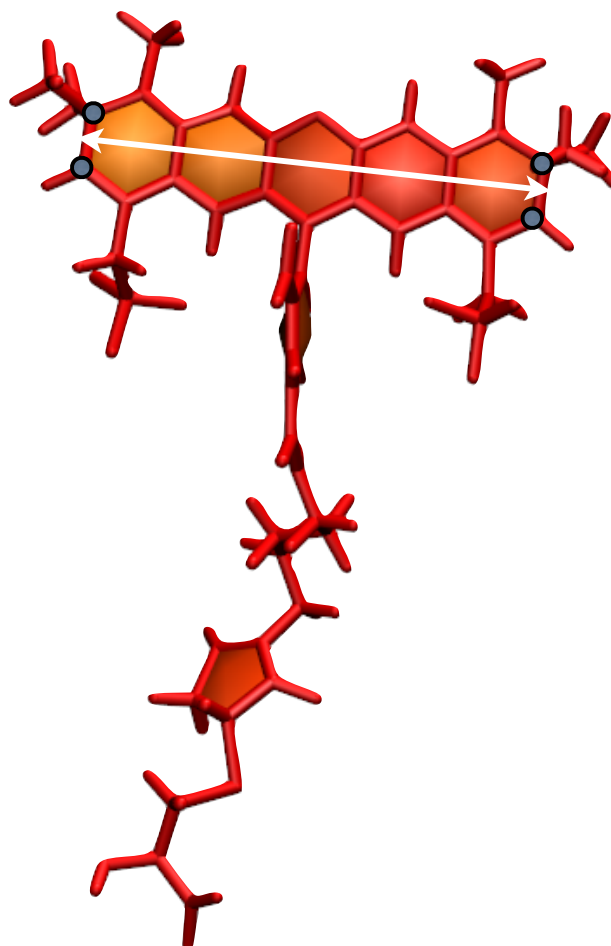

Figure S4: Blue molecule is the Alexa 488 attached at the N-terminus and red molecule is the Alexa 594 attached at the C-terminus. Both are shown with the paperchain representation in VMD.<sup>2</sup> Transition dipole vectors used for orientational factor  $\kappa^2$  calculation are shown with white arrows.
